# Supplementary material
Source: PubMed Central journal article supplement (PMC8820277)
Supplement: NIHMS1752900-supplement-1.pdf [file NIHMS1752900-supplement-1.pdf]

**Appendix**  
**Adaptive Goals and Reinforcement Timing to Increase Physical Activity in Adults: A Factorial Randomized Trial**  
**Adams et al.**

**Appendix Table 1.** Effects of Adaptive Goals and Immediate Reinforcement Components on MVPA Outcomes (N=512): Exponentiated Coefficients and 95% CIs (n=133,876 Daily Observations From 512 Participants)

| Model term                                                | Any MVPA                          | Any MVPA                          | MVPA bout-                        | MVPA bout-                        |
|-----------------------------------------------------------|-----------------------------------|-----------------------------------|-----------------------------------|-----------------------------------|
|                                                           | minutes/day                       | minutes/day                       | minutes/day                       | minutes/day                       |
|                                                           | Model 1                           | Model 2                           | Model 1                           | Model 2                           |
|                                                           | (OR)                              | (OR)                              | (IRR)                             | (IRR)                             |
| Adaptive goals (vs static)                                | 0.893<br>(0.676, 1.167)           | 0.895<br>(0.678, 1.183)           | 1.078<br>(0.973, 1.193)           | 1.088<br>(0.982, 1.206)           |
| Immediate reinforcement (vs delayed)                      | 1.106<br>(0.838, 1.427)           | 1.109<br>(0.839, 1.466)           | 0.978<br>(0.883, 1.084)           | 0.989<br>(0.892, 1.096)           |
| Phase (0=baseline, 1=intervention)                        | <b>1.963***</b><br>(1.821, 2.124) | <b>2.450***</b><br>(2.250, 2.669) | <b>1.454***</b><br>(1.416, 1.491) | <b>1.586***</b><br>(1.542, 1.631) |
| Adaptive goals x phase                                    | <b>1.407***</b><br>(1.211, 1.631) | <b>1.557***</b><br>(1.313, 1.847) | 0.972<br>(0.923, 1.024)           | 0.999<br>(0.944, 1.056)           |
| Immediate reinforcement x phase                           | <b>1.217*</b><br>(1.048, 1.414)   | 1.166<br>(0.983, 1.383)           | <b>1.177***</b><br>(1.117, 1.239) | <b>1.160***</b><br>(1.097, 1.227) |
| Days post-randomization                                   |                                   | <b>0.796***</b><br>(0.749, 0.846) |                                   | <b>0.914***</b><br>(0.899, 0.929) |
| Adaptive goals x days post-randomization                  |                                   | <b>0.856*</b><br>(0.757, 0.966)   |                                   | <b>0.952**</b><br>(0.921, 0.985)  |
| Immediate reinforcement x days post-random                |                                   | 1.018<br>(0.901, 1.151)           |                                   | 0.990<br>(0.957, 1.023)           |
| Days post-randomization squared                           |                                   | <b>1.038***</b><br>(1.021, 1.055) |                                   | <b>1.014***</b><br>(1.010, 1.019) |
| Adaptive goals x days post-randomization squared          |                                   | <b>1.042*</b><br>(1.008, 1.077)   |                                   | <b>1.012**</b><br>(1.003, 1.021)  |
| Immediate reinforcement x days post-randomization squared |                                   | 0.999<br>(0.966, 1.033)           |                                   | 1.005<br>(0.996, 1.014)           |

*Notes:* ORs from random intercepts logistic regression model component for Any MVPA. IRRs = Rate ratios from random intercepts negative binomial model component for Bout Minutes of MVPA. Results reflect adjustment for daily accelerometer wear time (minutes/day) and calendar month. To facilitate model convergence, post-randomization days variable was rescaled by multiplying by 0.01 prior to model estimation. Each model also includes a scaling (dispersion) parameter for the negative binomial component and a

**Appendix**  
**Adaptive Goals and Reinforcement Timing to Increase Physical Activity in Adults: A Factorial Randomized Trial**  
**Adams et al.**

covariance between the random intercepts of the logistic and negative binomial model components. Boldface indicates statistical significance (\* $p < 0.05$ ; \*\* $p < 0.01$ ; \*\*\* $p < 0.001$ ).

MVPA, moderate-to-vigorous physical activity.

**Appendix**  
**Adaptive Goals and Reinforcement Timing to Increase Physical Activity in Adults: A Factorial Randomized Trial**  
**Adams et al.**

**Appendix Table 2.** Intervention Between-Group Differences in MVPA Outcomes (N=512): Exponentiated Coefficients and 95% CIs (n=133,876 Daily Observations From 512 Participants)

| <b>Model term</b>                                                        | <b>Any MVPA minutes/day Model 1 (OR)</b> | <b>Any MVPA minutes/day Model 2 (OR)</b> | <b>MVPA bout-minutes/day Model 1 (IRR)</b> | <b>MVPA bout-minutes/day Model 2 (IRR)</b> |
|--------------------------------------------------------------------------|------------------------------------------|------------------------------------------|--------------------------------------------|--------------------------------------------|
| Adaptive goals + immediate reinforcement                                 | ref                                      | ref                                      | ref                                        | ref                                        |
| Static goals + immediate reinforcement                                   | 1.045<br>(0.704, 1.549)                  | 1.040<br>(0.700, 1.545)                  | 0.874<br>(0.757, 1.010)                    | 0.871<br>(0.753, 1.008)                    |
| Adaptive goals + immediate reinforcement                                 | 0.846<br>(0.571, 1.252)                  | 0.839<br>(0.566, 1.245)                  | 0.963<br>(0.833, 1.112)                    | 0.958<br>(0.830, 1.110)                    |
| Static goals + delayed reinforcement                                     | 1.014<br>(0.684, 1.502)                  | 1.008<br>(0.679, 1.496)                  | 0.943<br>(0.817, 1.090)                    | 0.938<br>(0.811, 1.084)                    |
| Phase                                                                    | <b>2.552***</b><br>(2.198, 2.965)        | <b>3.201***</b><br>(2.691, 3.808)        | <b>1.536***</b><br>(1.458, 1.618)          | <b>1.684***</b><br>(1.592, 1.780)          |
| Static goals + immediate reinforcement x phase                           | <b>0.737**</b><br>(0.595, 0.912)         | <b>0.681**</b><br>(0.533, 0.869)         | 1.065<br>(0.990, 1.145)                    | 1.044<br>(0.964, 1.129)                    |
| Adaptive goals + delayed reinforcement x phase                           | 0.851<br>(0.690, 1.049)                  | 0.909<br>(0.714, 1.158)                  | <b>0.882***</b><br>(0.820, 0.949)          | <b>0.897**</b><br>(0.828, 0.970)           |
| Static goals + delayed reinforcement x phase                             | <b>0.585**</b><br>(0.473, 0.723)         | <b>0.551***</b><br>(0.432, 0.702)        | <b>0.878***</b><br>(0.817, 0.945)          | <b>0.856***</b><br>(0.791, 0.926)          |
| Days post-randomization                                                  |                                          | <b>0.736***</b><br>(0.644, 0.841)        |                                            | <b>0.889***</b><br>(0.859, 0.919)          |
| Static goals + immediate reinforcement x days post-randomization         |                                          | 1.193<br>(0.996, 1.430)                  |                                            | 1.007<br>(0.961, 1.055)                    |
| Adaptive goals + immediate reinforcement x days post-randomization       |                                          | 0.997<br>(0.836, 1.189)                  |                                            | 1.047<br>(0.998, 1.099)                    |
| Static goals + delayed reinforcement x days post-randomization           |                                          | 1.153<br>(0.965, 1.378)                  |                                            | <b>1.065**</b><br>(1.015, 1.117)           |
| Days post-randomization squared                                          |                                          | <b>1.066***</b><br>(1.027, 1.106)        |                                            | <b>1.023***</b><br>(1.014, 1.033)          |
| Static goals + immediate reinforcement x days post-randomization squared |                                          | <b>0.947*</b><br>(0.901, 0.995)          |                                            | 0.998<br>(0.975, 1.001)                    |

**Appendix**  
**Adaptive Goals and Reinforcement Timing to Increase Physical Activity in Adults: A Factorial Randomized Trial**  
**Adams et al.**

|                                                                            |                         |                                  |
|----------------------------------------------------------------------------|-------------------------|----------------------------------|
| Adaptive goals + immediate reinforcement x days post-randomization squared | 0.990<br>(0.944, 1.038) | 0.995<br>(0.982, 1.007)          |
| Static goals + delayed reinforcement x days post-randomization squared     | 0.958<br>(0.913, 1.006) | <b>0.982**</b><br>(0.969, 0.995) |

*Notes:* ORs from random intercepts logistic regression model component for Any MVPA. IRRs = Rate ratios from random intercepts negative binomial model component for Bout Minutes of MVPA. Results reflect adjustment for daily accelerometer wear time (minutes/day) and calendar month. To facilitate model convergence, post-randomization days variable was rescaled by multiplying by 0.01 prior to model estimation. Each model also includes a scaling (dispersion) parameter for the negative binomial component and a covariance between the random intercepts of the logistic and negative binomial model components. Boldface indicates statistical significance (\* $p < 0.05$ ; \*\* $p < 0.01$ ; \*\*\* $p < 0.001$ ).

MVPA, moderate-to-vigorous physical activity.

**Appendix**  
**Adaptive Goals and Reinforcement Timing to Increase Physical Activity in Adults: A Factorial Randomized Trial**  
**Adams et al.**

**Appendix Table 3.** Model-Predicted Likelihood of Initiating Any MVPA, Mean MVPA Minutes/Day, and 95% CIs by Intervention Component Level at 60-Day Intervals (N=512)

| <b>Intervention component level</b> | <b>Baseline</b>         | <b>1</b>                | <b>60</b>               | <b>120</b>              | <b>180</b>              | <b>240</b>              | <b>300</b>              | <b>360</b>              |
|-------------------------------------|-------------------------|-------------------------|-------------------------|-------------------------|-------------------------|-------------------------|-------------------------|-------------------------|
| <b>Likelihood of any MVPA/day</b>   |                         |                         |                         |                         |                         |                         |                         |                         |
| Adaptive goals (n=256)              | 0.705<br>(0.661, 0.746) | 0.879<br>(0.858, 898)   | 0.861<br>(0.838, 0.882) | 0.846<br>(0.821, 0.868) | 0.836<br>(0.809, 0.859) | 0.830<br>(0.803, 0.854) | 0.830<br>(0.803, 0.854) | 0.836<br>(0.809, 0.861) |
| Static goals (n=256)                | 0.728<br>(0.686, 0.767) | 0.840<br>(0.812, 0.863) | 0.828<br>(0.801, 0.853) | 0.818<br>(0.789, 0.843) | 0.809<br>(0.779, 0.835) | 0.801<br>(0.771, 0.828) | 0.795<br>(0.764, 0.823) | 0.791<br>(0.758, 0.820) |
| Immediate reinforcement (n=256)     | 0.727<br>(0.685, 0.766) | 0.876<br>(0.854, 0.895) | 0.863<br>(0.840, 0.883) | 0.852<br>(0.827, 0.873) | 0.843<br>(0.817, 0.866) | 0.838<br>(0.811, 0.861) | 0.836<br>(0.809, 0.860) | 0.838<br>(0.809, 0.863) |
| Delayed reinforcement (n=256)       | 0.706<br>(0.662, 0.747) | 0.845<br>(0.819, 0.868) | 0.828<br>(0.801, 0.852) | 0.813<br>(0.784, 0.839) | 0.801<br>(0.771, 0.829) | 0.794<br>(0.763, 0.822) | 0.790<br>(0.759, 0.819) | 0.791<br>(0.758, 0.821) |
| <b>Mean MVPA minutes/day</b>        |                         |                         |                         |                         |                         |                         |                         |                         |
| Adaptive goals (n=256)              | 15.55<br>(14.08, 17.18) | 28.40<br>(26.08, 30.93) | 26.31<br>(24.18, 28.62) | 24.80<br>(22.78, 26.99) | 23.82<br>(21.86, 25.95) | 23.30<br>(21.37, 25.41) | 23.24<br>(21.28, 25.37) | 23.60<br>(21.56, 25.85) |
| Static goals (n=256)                | 14.55<br>(13.18, 16.06) | 25.24<br>(23.14, 27.53) | 24.12<br>(22.13, 26.29) | 23.19<br>(21.26, 25.29) | 22.46<br>(20.58, 24.50) | 21.90<br>(20.06, 23.90) | 21.50<br>(19.69, 23.48) | 21.26<br>(19.42, 23.28) |
| Immediate reinforcement (n=256)     | 15.10<br>(13.68, 16.67) | 29.13<br>(26.8, 31.61)  | 27.39<br>(25.26, 29.70) | 26.10<br>(24.06, 28.32) | 25.24<br>(23.23, 27.41) | 24.75<br>(22.77, 26.91) | 24.63<br>(22.64, 26.81) | 24.87<br>(22.80, 27.14) |
| Delayed reinforcement (n=256)       | 15.00<br>(13.68, 16.46) | 24.76<br>(22.90, 26.77) | 23.30<br>(21.56, 25.17) | 22.15<br>(20.48, 23.95) | 21.30<br>(19.69, 23.05) | 20.73<br>(19.15, 22.44) | 20.40<br>(18.84, 22.09) | 20.32<br>(18.73, 22.04) |

MVPA, moderate-to-vigorous physical activity.

**Appendix**  
**Adaptive Goals and Reinforcement Timing to Increase Physical Activity in Adults: A Factorial Randomized Trial**  
**Adams et al.**

**Appendix Table 4.** Model-Predicted Likelihood of Initiating Any MVPA, Mean MVPA Minutes/Day, and 95% CIs by Intervention Group at 60-Day Intervals (N=512)

| <b>Intervention group</b>                        | <b>Baseline</b>         | <b>1</b>                | <b>60</b>                | <b>120</b>              | <b>180</b>               | <b>240</b>              | <b>300</b>              | <b>360</b>              |
|--------------------------------------------------|-------------------------|-------------------------|--------------------------|-------------------------|--------------------------|-------------------------|-------------------------|-------------------------|
| <b>Likelihood of any MVPA/day</b>                |                         |                         |                          |                         |                          |                         |                         |                         |
| Adaptive goals + immediate reinforcement (n=128) | 0.723<br>(0.663, 0.777) | 0.893<br>(0.865, 0.916) | 0.877<br>(0.847, 0.902)  | 0.864<br>(0.832, 0.891) | 0.856<br>(0.821, 0.884)  | 0.853<br>(0.818, 0.882) | 0.856<br>(0.821, 0.884) | 0.864<br>(0.829, 0.893) |
| Static goals + immediate reinforcement (n=128)   | 0.731<br>(0.671, 0.784) | 0.855<br>(0.820, 0.885) | 0.846<br>(0.8104, 0.876) | 0.837<br>(0.800, 0.869) | 0.829<br>(0.790, 0.861)  | 0.821<br>(0.780, 0.855) | 0.813<br>(0.772, 0.849) | 0.807<br>(0.762, 0.846) |
| Adaptive goals + delayed reinforcement (n=128)   | 0.687<br>(0.623, 0.745) | 0.864<br>(0.831, 0.892) | 0.844<br>(0.808, 0.874)  | 0.826<br>(0.788, 0.859) | 0.813<br>(0.772, 0.848)  | 0.805<br>(0.763, 0.842) | 0.803<br>(0.761, 0.840) | 0.808<br>(0.764, 0.849) |
| Static goals + delayed reinforcement (n=128)     | 0.725<br>(0.665, 0.778) | 0.823<br>(0.782, 0.858) | 0.809<br>(0.768, 0.845)  | 0.797<br>(0.754, 0.835) | 0.787<br>(0.743, 0.8264) | 0.780<br>(0.734, 0.820) | 0.774<br>(0.728, 0.815) | 0.772<br>(0.722, 0.815) |
| <b>Mean MVPA minutes/day</b>                     |                         |                         |                          |                         |                          |                         |                         |                         |
| Adaptive goals + immediate reinforcement (n=128) | 15.99<br>(13.73, 18.62) | 30.91<br>(27.34, 34.94) | 28.65<br>(25.36, 32.37)  | 27.07<br>(23.93, 30.62) | 26.11<br>(23.04, 29.59)  | 25.71<br>(22.66, 29.17) | 25.84<br>(22.73, 29.38) | 26.52<br>(23.23, 30.27) |
| Static goals + immediate reinforcement (n=128)   | 14.00<br>(11.97, 16.37) | 27.17<br>(23.71, 31.14) | 25.94<br>(22.62, 29.73)  | 24.93<br>(21.71, 28.63) | 24.15<br>(20.99, 27.79)  | 23.58<br>(20.47, 27.17) | 23.21<br>(20.12, 26.77) | 23.02<br>(19.90, 26.64) |
| Adaptive goals + delayed reinforcement (n=128)   | 14.86<br>(12.90, 17.11) | 25.95<br>(23.24, 28.98) | 24.01<br>(21.49, 26.84)  | 22.57<br>(20.15, 25.27) | 21.57<br>(19.23, 24.19)  | 20.97<br>(18.69, 23.53) | 20.74<br>(18.49, 23.25) | 20.86<br>(18.59, 23.39) |
| Static goals + delayed reinforcement (n=128)     | 15.00<br>(13.05, 17.24) | 23.38<br>(20.81, 26.27) | 22.41<br>(19.98, 25.12)  | 21.58<br>(19.22, 24.22) | 20.88<br>(18.58, 23.47)  | 20.32<br>(18.07, 22.86) | 19.88<br>(17.65, 22.40) | 19.55<br>(17.28, 22.12) |

MVPA, moderate-to-vigorous physical activity.

**Appendix**  
**Adaptive Goals and Reinforcement Timing to Increase Physical Activity in Adults: A Factorial Randomized Trial**  
**Adams et al.**

**Appendix Table 5.** Effects of Adaptive Goals and Immediate Reinforcement Components on MVPA Outcomes (N=512): Exponentiated ZINB Coefficients and 95% CIs (n=133,875 Daily Observations From 512 Participants)

| Model term                                                | Any MVPA minutes/day              |                                   | MVPA bout-minutes/day             |                                   |
|-----------------------------------------------------------|-----------------------------------|-----------------------------------|-----------------------------------|-----------------------------------|
|                                                           | Model 1 (OR)                      | Model 2 (OR)                      | Model 1 (IRR)                     | Model 2 (IRR)                     |
| Adaptive goals (vs static)                                | 0.867<br>(0.652, 1.153)           | 0.870<br>(0.652, 1.160)           | 1.078<br>(0.974, 1.194)           | 1.087<br>(0.981, 1.205)           |
| Immediate reinforcement (vs delayed)                      | 1.099<br>(0.826, 1.461)           | 1.118<br>(0.838, 1.490)           | 0.979<br>(0.884, 1.084)           | 0.992<br>(0.895, 1.099)           |
| Phase (0=baseline, 1=intervention)                        | <b>1.943***</b><br>(1.797, 2.100) | <b>2.423***</b><br>(2.217, 2.647) | <b>1.459***</b><br>(1.422, 1.497) | <b>1.592***</b><br>(1.548, 1.637) |
| Adaptive goals x phase                                    | <b>1.434***</b><br>(1.223, 1.675) | <b>1.588***</b><br>(1.330, 1.896) | 0.969<br>(0.920, 1.020)           | 0.998<br>(0.944, 1.055)           |
| Immediate reinforcement x phase                           | <b>1.204*</b><br>(1.031, 1.407)   | 1.168<br>(0.978, 1.394)           | <b>1.174***</b><br>(1.115, 1.236) | <b>1.159***</b><br>(1.096, 1.226) |
| Days post-randomization                                   |                                   | <b>0.791***</b><br>(0.743, 0.842) |                                   | <b>0.915***</b><br>(0.990, 0.930) |
| Adaptive goals x days post-randomization                  |                                   | <b>0.856*</b><br>(0.755, 0.971)   |                                   | <b>0.952**</b><br>(0.920, 0.984)  |
| Immediate reinforcement x days post-random                |                                   | 1.014<br>(0.893, 1.150)           |                                   | 0.990<br>(0.958, 1.024)           |
| Days post-randomization squared                           |                                   | <b>1.040***</b><br>(1.022, 1.058) |                                   | <b>1.014***</b><br>(1.009, 1.019) |
| Adaptive goals x days post-randomization squared          |                                   | <b>1.042*</b><br>(1.007, 1.078)   |                                   | <b>1.012**</b><br>(1.003, 1.021)  |
| Immediate reinforcement x days post-randomization squared |                                   | 1.000<br>(0.966, 1.035)           |                                   | 1.005<br>(0.996, 1.014)           |

*Notes:* ORs from mixed effects logistic regression model of Any MVPA. IRRs = Rate ratios from mixed effects negative binomial model of Bout Minutes of MVPA. Results reflect adjustment for daily accelerometer wear time (minutes/day) and calendar month. Models also include random participant-level intercept effects. Boldface indicates statistical significance (\* $p < 0.05$ ; \*\* $p < 0.01$ ; \*\*\* $p < 0.001$ ).

**Appendix**  
**Adaptive Goals and Reinforcement Timing to Increase Physical Activity in Adults: A Factorial Randomized Trial**  
**Adams et al.**

MVPA, moderate-to-vigorous physical activity; ZINB, zero inflated negative binomial.

**Appendix**  
**Adaptive Goals and Reinforcement Timing to Increase Physical Activity in Adults: A Factorial Randomized Trial**  
**Adams et al.**

**Appendix Table 6.** Intervention Between-Group Differences in MVPA Outcomes (N=512): Exponentiated ZINB Coefficients and 95% CIs (n=133,875 Daily Observations From 512 Participants)

| Model term                                                               | Any MVPA minutes/day              | Any MVPA minutes/day              | MVPA bout-minutes/day             | MVPA bout-minutes/day             |
|--------------------------------------------------------------------------|-----------------------------------|-----------------------------------|-----------------------------------|-----------------------------------|
|                                                                          | Model 1<br>(OR)                   | Model 2<br>(OR)                   | Model 1<br>(IRR)                  | Model 2<br>(IRR)                  |
| Adaptive goals + immediate reinforcement                                 | ref                               | ref                               | ref                               | ref                               |
| Static goals + immediate reinforcement                                   | 1.083<br>(0.724, 1.621)           | 1.088<br>(0.726, 1.623)           | 0.877<br>(0.759, 1.012)           | 0.880<br>(0.761, 1.018)           |
| Adaptive goals + immediate reinforcement                                 | 0.849<br>(0.569, 1.268)           | 0.851<br>(0.570, 1.271)           | 0.964<br>(0.834, 1.113)           | 0.952<br>(0.824, 1.101)           |
| Static goals + delayed reinforcement                                     | 1.047<br>(0.700, 1.566)           | 1.047<br>(0.700, 1.566)           | 0.941<br>(0.815, 1.087)           | 0.935<br>(0.809, 1.081)           |
| Phase                                                                    | <b>2.654***</b><br>(2.274, 3.096) | <b>3.300***</b><br>(2.783, 3.984) | <b>1.546***</b><br>(1.468, 1.628) | <b>1.679***</b><br>(1.587, 1.775) |
| Static goals + immediate reinforcement x phase                           | <b>0.734**</b><br>(0.589, 0.915)  | <b>0.677**</b><br>(0.526, 0.872)  | 1.052<br>(0.978, 1.131)           | 1.037<br>(0.959, 1.123)           |
| Adaptive goals + delayed reinforcement x phase                           | 0.869<br>(0.701, 1.078)           | 0.923<br>(0.720, 1.184)           | <b>0.876***</b><br>(0.814, 0.942) | <b>0.896**</b><br>(0.828, 0.970)  |
| Static goals + delayed reinforcement x phase                             | <b>0.581***</b><br>(0.467, 0.723) | <b>0.544***</b><br>(0.423, 0.699) | <b>0.868***</b><br>(0.807, 0.933) | <b>0.860***</b><br>(0.795, 0.931) |
| Days post-randomization                                                  |                                   | <b>0.735***</b><br>(0.640, 0.844) |                                   | <b>0.889***</b><br>(0.859, 0.919) |
| Static goals + immediate reinforcement x days post-randomization         |                                   | 1.201<br>(0.996, 1.449)           |                                   | 1.046<br>(0.997, 1.097)           |
| Adaptive goals + immediate reinforcement x days post-randomization       |                                   | 1.011<br>(0.842, 1.214)           |                                   | 1.010<br>(0.964, 1.058)           |
| Static goals + delayed reinforcement x days post-randomization           |                                   | 1.161<br>(0.966, 1.396)           |                                   | <b>1.066**</b><br>(1.016, 1.118)  |
| Days post-randomization squared                                          |                                   | <b>1.065**</b><br>(1.026, 1.107)  |                                   | <b>1.023***</b><br>(1.014, 1.033) |
| Static goals + immediate reinforcement x days post-randomization squared |                                   | <b>0.942*</b><br>(0.895, 0.992)   |                                   | 0.988<br>(0.975, 1.001)           |

**Appendix**  
**Adaptive Goals and Reinforcement Timing to Increase Physical Activity in Adults: A Factorial Randomized Trial**  
**Adams et al.**

|                                                                            |                         |                                  |
|----------------------------------------------------------------------------|-------------------------|----------------------------------|
| Adaptive goals + immediate reinforcement x days post-randomization squared | 0.987<br>(0.940, 1.038) | 0.993<br>(0.981, 1.007)          |
| Static goals + delayed reinforcement x days post-randomization squared     | 0.960<br>(0.913, 1.009) | <b>0.982**</b><br>(0.969, 0.995) |

*Notes:* ORs from mixed effects logistic regression model of Any MVPA. IRRs = Rate ratios from mixed effects negative binomial model of Bout Minutes of MVPA Results reflect adjustment for daily accelerometer wear time (minutes/day) and calendar month. Models also include random participant-level intercept effects. Boldface indicates statistical significance (\* $p < 0.05$ ; \*\* $p < 0.01$ ; \*\*\* $p < 0.001$ ).

MVPA, moderate-to-vigorous physical activity; ZINB, zero inflated negative binomial.
